# Supplementary material
Source: MDPI journal article supplement (https://www.mdpi.com/2071-1050/11/4/1091)
Supplement: s1 [file s1]

## Appendix 1

### List of papers reviewed

| S.No. | Authors                                                                                                      | Year | Title                                                                                                                                                                 | Sources                                                            |
|-------|--------------------------------------------------------------------------------------------------------------|------|-----------------------------------------------------------------------------------------------------------------------------------------------------------------------|--------------------------------------------------------------------|
| 1     | Thorgren, Sara;<br>Omoredede,<br>Adesuwa                                                                     | 2018 | Passionate Leaders in Social Entrepreneurship:<br>Exploring an African Context                                                                                        | Business & Society                                                 |
| 2     | Littlewood, David;<br>Holt, Diane                                                                            | 2018 | Social Entrepreneurship in South Africa: Exploring<br>the Influence of Environment                                                                                    | Business & Society                                                 |
| 3     | Cincera, Jan;<br>Biberhofer, Petra;<br>Binka, Bohuslav;<br>Boman, Johan;<br>Mindt, Lisa;<br>Rieckmann, Marco | 2018 | Designing a sustainability-driven entrepreneurship<br>curriculum as a social learning process: A case study<br>from an international knowledge alliance project       | Journal of Cleaner<br>Production                                   |
| 4     | Ayuso, Silvia;<br>Ernesto Navarrete-<br>Baez, Francisco                                                      | 2018 | How Does Entrepreneurial and International<br>Orientation Influence SMEs' Commitment to<br>Sustainable Development? Empirical Evidence from<br>Spain and Mexico       | Corporate Social<br>Responsibility and<br>Environmental Management |
| 5     | Arbolino, Roberta;<br>Carlucci, Fabio;<br>Cira, Andrea;<br>Yigitcanlar, Tan;<br>Ioppolo, Giuseppe            | 2018 | Mitigating regional disparities through<br>microfinancing: An analysis of microcredit as a<br>sustainability tool for territorial development in Italy                | Land Use Policy                                                    |
| 6     | Rinaldi, Chiara;<br>Cavicchi, Alessio;<br>Spigarelli,<br>Francesca; Lacche,<br>Luigi; Rubens,<br>Arthur      | 2018 | Universities and smart specialisation strategy From<br>third mission to sustainable development co-creation                                                           | International Journal of<br>Sustainability in Higher<br>Education  |
| 7     | Rizzi, Francesco;<br>Pellegrini, Chiara;<br>Battaglia, Massimo                                               | 2018 | The structuring of social finance: Emerging<br>approaches for supporting environmentally and<br>socially impactful projects                                           | Journal of Cleaner<br>Production                                   |
| 8     | Tulla, Antoni-<br>Francesc; Stoica,<br>Ilinca-Valentina;<br>Pallares-Blanch,<br>Marta; Zamfir,<br>Daniela    | 2017 | Can Naturbanization promote Environmentally<br>Friendly built-up areas? A Comparison between<br>Cadi-Moixero (Catalonia, Spain) and Comana<br>(Romania) natural parks | European Countryside                                               |

|    |                                                                                                                                                                |      |                                                                                                                                                                      |                                                                 |
|----|----------------------------------------------------------------------------------------------------------------------------------------------------------------|------|----------------------------------------------------------------------------------------------------------------------------------------------------------------------|-----------------------------------------------------------------|
| 9  | Dragoi, Mihaela Cristina; Iamandi, Irina-Eugenia; Munteanu, Sebastian Madalin; Ciobanu, Radu; Tartavulea (Dieaconescu), Ramona Iulia; Ladaru, Raluca Georgiana | 2017 | Incentives for Developing Resilient Agritourism Entrepreneurship in Rural Communities in Romania in a European Context                                               | Sustainability                                                  |
| 10 | Li, Gonghua                                                                                                                                                    | 2017 | Role of Innovation and Entrepreneurship Education in Improving Employability of Medical University Students                                                          | Eurasia Journal of Mathematics Science and Technology Education |
| 11 | Scheyvens, Regina; Banks, Glenn; Meo-Sewabu, Litea; Decena, Tracy                                                                                              | 2017 | Indigenous entrepreneurship on customary land in the Pacific: Measuring sustainability                                                                               | Journal of Management & Organization                            |
| 12 | del Mar Alonso-Almeida, Maria; Buil-Fabrega, Marian; Bagur-Femenias, Llorenc; Pedro Aznar-Alarcon, Juan                                                        | 2017 | Shedding Light on Sustainable Development and Stakeholder Engagement: The Role of Individual Dynamic Capabilities                                                    | Sustainable Development                                         |
| 13 | Wozniak, Justyna; Pactwa, Katarzyna                                                                                                                            | 2017 | Environmental Activity of Mining Industry Leaders in Poland in Line with the Principles of Sustainable Development                                                   | Sustainability                                                  |
| 14 | Wu, Guo-Ciang                                                                                                                                                  | 2017 | Effects of Socially Responsible Supplier Development and Sustainability-Oriented Innovation on Sustainable Development: Empirical Evidence from SMEs                 | Corporate Social Responsibility and Environmental Management    |
| 15 | Ben Slimane, Karim; Lamine, Wadid                                                                                                                              | 2017 | A transaction-based approach to social innovation                                                                                                                    | International Journal of Entrepreneurship and Innovation        |
| 16 | Ceptureanu, Eduard-Gabriel; Ceptureanu, Sebastian-Ion; Orzan, Mihai Cristian; Bordean, Ovidiu Niculae; Radulescu, Violeta                                      | 2017 | Empirical Study on Sustainable Opportunities Recognition. A Polyvinyl Chloride (PVC) Joinery Industry Analysis Using Augmented Sustainable Development Process Model | Sustainability                                                  |
| 17 | Kraus, Sascha; Burtscher, Janina; Niemand, Thomas; Roig-Tierno, Norat; Syrja, Pasi                                                                             | 2017 | Configurational Paths to Social Performance in SMEs: The Interplay of Innovation, Sustainability, Resources and Achievement Motivation                               | Sustainability                                                  |

|    |                                                                                                                                                                                                                                    |      |                                                                                                                                              |                                               |
|----|------------------------------------------------------------------------------------------------------------------------------------------------------------------------------------------------------------------------------------|------|----------------------------------------------------------------------------------------------------------------------------------------------|-----------------------------------------------|
| 18 | Dedeurwaerdere, Tom; De Schutter, Olivier; Hudon, Marek; Mathijs, Erik; Annaert, Bernd; Avermaete, Tessa; Bleeckx, Thomas; de Callatay, Charlotte; De Snijder, Pepijn; Fernandez-Wulff, Paula; Joachain, Helene; Vivero, Jose-Luis | 2017 | The Governance Features of Social Enterprise and Social Network Activities of Collective Food Buying Groups                                  | Ecological Economics                          |
| 19 | Delgado, Cecilia                                                                                                                                                                                                                   | 2017 | Mapping urban agriculture in Portugal: Lessons from practice and their relevance for European post-crisis contexts                           | Moravian Geographical Reports                 |
| 20 | Kalafatis, Scott E.                                                                                                                                                                                                                | 2017 | Identifying the Potential for Climate Compatible Development Efforts and the Missing Links                                                   | Sustainability                                |
| 21 | Ketschau, Thilo J.                                                                                                                                                                                                                 | 2017 | A Conceptual Framework for the Integration of Corporate Social Responsibility and Human Resource Development Based on Lifelong Learning      | Sustainability                                |
| 22 | Ren, Hao; Wang, Rongrong; Zhang, Suopeng; Zhang, An                                                                                                                                                                                | 2017 | How Do Internet Enterprises Obtain Sustainable Development of Organizational Ecology? A Case Study of LeEco Using Institutional Logic Theory | Sustainability                                |
| 23 | Rosenbloom, Al; Gudic, Milenko; Parkes, Carole; Kronbach, Britta                                                                                                                                                                   | 2017 | A PRME response to the challenge of fighting poverty: How far have we come? Where do we need to go now?                                      | International Journal of Management Education |
| 24 | Picciotti, Antonio                                                                                                                                                                                                                 | 2017 | Towards Sustainability: The Innovation paths of Social Enterprise                                                                            | Annals of Public and Cooperative Economics    |
| 25 | Buil-Fabrega, Marian; del Mar Alonso-Almeida, Maria; Bagur-Femenias, Llorenc                                                                                                                                                       | 2017 | Individual dynamic managerial capabilities: Influence over environmental and social commitment under a gender perspective                    | Journal of Cleaner Production                 |
| 26 | Provasnek, Anna Katharina; Schmid, Erwin; Geissler, Bernhard; Steiner, Gerald                                                                                                                                                      | 2017 | Sustainable Corporate Entrepreneurship: Performance and Strategies Toward Innovation                                                         | Business Strategy and the Environment         |

|    |                                                                                                                                          |      |                                                                                                                                                             |                                                                                               |
|----|------------------------------------------------------------------------------------------------------------------------------------------|------|-------------------------------------------------------------------------------------------------------------------------------------------------------------|-----------------------------------------------------------------------------------------------|
| 27 | Ruiu, Maria Laura;<br>Maurizi, Sante;<br>Sassu, Simone;<br>Seddaiu, Giovanna;<br>Zuin, Olga;<br>Blackmore, Chris;<br>Roggero, Pier Paolo | 2017 | Re-Staging La Rasgioni: Lessons Learned from Transforming a Traditional Form of Conflict Resolution to Engage Stakeholders in Agricultural Water Governance | Water                                                                                         |
| 28 | Neal, Mark                                                                                                                               | 2017 | Learning From Poverty: Why Business Schools Should Address Poverty, and How They Can Go About It                                                            | Academy of Management Learning & Education                                                    |
| 29 | Stubbs, Wendy                                                                                                                            | 2017 | Sustainable Entrepreneurship and B Corps                                                                                                                    | Business Strategy and the Environment                                                         |
| 30 | Hammer, Janet;<br>Pivo, Gary                                                                                                             | 2017 | The Triple Bottom Line and Sustainable Economic Development Theory and Practice                                                                             | Economic Development Quarterly                                                                |
| 31 | Vakkayil, Jacob                                                                                                                          | 2017 | Resistance and integration: Working with capitalism at its fringes                                                                                          | Management                                                                                    |
| 32 | Abdullah, Rose;<br>Ismail, Abdul Ghafar                                                                                                  | 2017 | Taking stock of the waqf-based Islamic microfinance model                                                                                                   | International Journal of Social Economics                                                     |
| 33 | Motta, Wallis; Dini, Paolo; Sartori, Laura                                                                                               | 2017 | Self-Funded Social Impact Investment: An Interdisciplinary Analysis of the Sardex Mutual Credit System                                                      | Journal of Social Entrepreneurship                                                            |
| 34 | Serenari, Christopher;<br>Peterson, M. Nils;<br>Wallace, Tim;<br>Stowhas, Paulina                                                        | 2017 | Private protected areas, ecotourism development and impacts on local people's well-being: a review from case studies in Southern Chile                      | Journal of Sustainable Tourism                                                                |
| 35 | Jonas, Andrew E. G.; Wurzel, Rudiger K. W.; Monaghan, Elizabeth; Osthorst, Winfried                                                      | 2017 | Climate change, the green economy and reimagining the city: the case of structurally disadvantaged European maritime port cities                            | Erde                                                                                          |
| 36 | Favre, Carole C.                                                                                                                         | 2017 | The Small2Mighty tourism academy Growing business to grow women as a transformative strategy for emerging destinations                                      | Worldwide Hospitality and Tourism Themes                                                      |
| 37 | Brombal, Daniele;<br>Moriggi, Angela                                                                                                     | 2017 | Institutional Change in China's Sustainable Urban Development A Case Study on Urban Renewal and Water Environmental Management                              | China Perspectives                                                                            |
| 38 | Coca, Oana; Stefan, Gavril; Mironiuc, Marilena                                                                                           | 2017 | Empirical evidences regarding the Relationship between Innovation and Performance in the Agriculture of European Union                                      | Scientific Papers-Series Management Economic Engineering in Agriculture and Rural Development |
| 39 | de lange, Deborah;<br>Dodds, Rachel                                                                                                      | 2017 | Increasing sustainable tourism through social entrepreneurship                                                                                              | International Journal of Contemporary Hospitality Management                                  |
| 40 | Anisimov, Aleksey;<br>Lidzheeva, Kermen;                                                                                                 | 2017 | Modern Issues of Development of the System of Specially Protected Natural Areas in the Context of the Concept of Sustainable Development                    | Problemy Ekorozwoju                                                                           |

|    |                                                                                                        |      |                                                                                                                                                                                                  |                                                                             |
|----|--------------------------------------------------------------------------------------------------------|------|--------------------------------------------------------------------------------------------------------------------------------------------------------------------------------------------------|-----------------------------------------------------------------------------|
|    | Ryzhenkov,<br>Anatoliy                                                                                 |      |                                                                                                                                                                                                  |                                                                             |
| 41 | Mykolaivna, Revko<br>Alona                                                                             | 2017 | Social Entrepreneurship as the main resource for the<br>Regional Development                                                                                                                     | Marketing and Management<br>of Innovations                                  |
| 42 | Silvestri, Antonella;<br>Veltri, Stefania                                                              | 2017 | Ethical strategic alliances for the sustainable<br>recovering of a territory                                                                                                                     | Corporate Governance-The<br>International Journal of<br>Business in Society |
| 43 | Polak, James;<br>Snowball, Jen                                                                         | 2017 | Towards a framework for assessing the sustainability<br>of local economic development based on natural<br>resources: honeybush tea in the Eastern Cape<br>Province of South Africa               | Local Environment                                                           |
| 44 | Affolderbach, Julia;<br>Krueger, Rob                                                                   | 2017 | Just ecopreneurs: re-conceptualising green transitions<br>and entrepreneurship                                                                                                                   | Local Environment                                                           |
| 45 | Garrigos Simon,<br>Fernando J.;<br>Gonzalez-Cruz,<br>Tomas; Contreras-<br>Pacheco, Orlando             | 2017 | Policies to enhance social development through the<br>promotion of SME and social entrepreneurship: a<br>study in the Colombian construction industry                                            | Entrepreneurship and<br>Regional Development                                |
| 46 | Belz, Frank Martin;<br>Binder, Julia<br>Katharina                                                      | 2017 | Sustainable Entrepreneurship: A Convergent Process<br>Model                                                                                                                                      | Business Strategy and the<br>Environment                                    |
| 47 | Arnold, Marlen                                                                                         | 2017 | Fostering sustainability by linking co-creation and<br>relationship management concepts                                                                                                          | Journal of Cleaner<br>Production                                            |
| 48 | Ma, Yong Yuan;<br>Sia, Choon Ling; Li,<br>Yao; Zheng,<br>Songyue                                       | 2016 | Sources of resources, alliance green management,<br>and alliance performance in an emerging economy                                                                                              | Journal of Cleaner<br>Production                                            |
| 49 | de Lange, Deborah<br>E.                                                                                | 2016 | A social capital paradox: Entrepreneurial dynamism<br>in a small world clean technology cluster                                                                                                  | Journal of Cleaner<br>Production                                            |
| 50 | Hollnagel, Heloisa<br>Candia; Simoes de<br>Araujo, Luiz<br>Jurandir; Pereira<br>Bueno, Ricardo<br>Luiz | 2016 | Analysis of the Contribution of Small Residential<br>Care Centres for the Elderly to reduce the Socio<br>Environmental impact and foster Entrepreneurship<br>in Brazilian Megacities (Sao Paulo) | Risus-Journal on Innovation<br>and Sustainability                           |
| 51 | Steinz, Henk J.;<br>Van Rijnsoever,<br>Frank J.; Nauta,<br>Frans                                       | 2016 | How to Green the red Dragon: A Start-ups' Little<br>Helper for Sustainable Development in China                                                                                                  | Business Strategy and the<br>Environment                                    |
| 52 | Baroniene, Laura;<br>Zirgutis, Vytautas                                                                | 2016 | Management Decisions for Sustainable Development:<br>Medical Software case study                                                                                                                 | Entrepreneurship and<br>Sustainability Issues                               |
| 53 | de Lange, Deborah<br>E.                                                                                | 2016 | Legitimation Strategies for Clean Technology<br>Entrepreneurs Facing Institutional Voids in<br>Emerging Economies                                                                                | Journal of International<br>Management                                      |

|    |                                                                                                     |      |                                                                                                                              |                                                              |
|----|-----------------------------------------------------------------------------------------------------|------|------------------------------------------------------------------------------------------------------------------------------|--------------------------------------------------------------|
| 54 | Rahdari, Amir;<br>Sepasi, Sahar;<br>Moradi,<br>Mohammad                                             | 2016 | Achieving sustainability through Schumpeterian social entrepreneurship: The role of social enterprises                       | Journal of Cleaner Production                                |
| 55 | Monshidi, Faezeh;<br>Choolandimi,<br>Azadeh Amiri                                                   | 2016 | Studying the effects of Agriculture on Sustainable Development in some villages of Hamidieh                                  | Iioab Journal                                                |
| 56 | Estape-Dubreuil,<br>Gloria; Ashta,<br>Arvind; Hedou,<br>Jean-Pierre                                 | 2016 | Micro-equity for sustainable development: Selection, monitoring and exit strategies of micro-angels                          | Ecological Economics                                         |
| 57 | Lane, Eifiona<br>Thomas; Jones,<br>Rebecca; Jones,<br>Arwel;<br>Mitchelmore,<br>Siwan               | 2016 | Exploring the potential of local food and drink entrepreneurship in rural Wales                                              | Local Economy                                                |
| 58 | Larsson, Markus;<br>Milestad, Rebecka;<br>Hahn, Thomas; von<br>Oelreich, Jacob                      | 2016 | The Resilience of a Sustainability Entrepreneur in the Swedish Food System                                                   | Sustainability                                               |
| 59 | Beninger, Stefanie;<br>Francis, June N. P.                                                          | 2016 | Appropriation of Community Knowledge: Towards an Understanding of the Potential Harm and Benefits                            | Journal of Macromarketing                                    |
| 60 | Szczanowicz,<br>Justyna; Saniuk,<br>Sebastian                                                       | 2016 | Evaluation and reporting of CSR in SME sector                                                                                | Management-Poland                                            |
| 61 | Rahman, Syed<br>Abidur; Amran,<br>Azlan; Ahmad,<br>Noor Hazlina;<br>Taghizadeh,<br>Seyedeh Khadijeh | 2016 | Enhancing the Wellbeing of Base of the Pyramid Entrepreneurs through Business Success: The Role of Private Organizations     | Social Indicators Research                                   |
| 62 | Rinkinen, Satu;<br>Oikarinen, Tuija;<br>Melkas, Helina                                              | 2016 | Social enterprises in regional innovation systems: a review of Finnish regional strategies                                   | European Planning Studies                                    |
| 63 | de Bruin, Anne                                                                                      | 2016 | Towards a framework for understanding transitional green entrepreneurship                                                    | Small Enterprise Research                                    |
| 64 | Liu, Shuwen;<br>Cheung, Lewis T.<br>O.                                                              | 2016 | Sense of place and tourism business development                                                                              | Tourism Geographies                                          |
| 65 | He, Xiaohong;<br>Chen, Xi                                                                           | 2016 | Empirical Effects of Entrepreneurship on Regional Development: A Chinese Local Perspective                                   | Journal of Developmental Entrepreneurship                    |
| 66 | Chang, Ching-Hsun                                                                                   | 2016 | The Determinants of Green Product Innovation Performance                                                                     | Corporate Social Responsibility and Environmental Management |
| 67 | Kurowska-Pysz,<br>Joanna                                                                            | 2016 | Opportunities for Cross-Border Entrepreneurship Development in a Cluster Model Exemplified by the Polish-Czech Border Region | Sustainability                                               |

|    |                                                                                                                                                                                                                                                                                                             |      |                                                                                                                           |                                      |
|----|-------------------------------------------------------------------------------------------------------------------------------------------------------------------------------------------------------------------------------------------------------------------------------------------------------------|------|---------------------------------------------------------------------------------------------------------------------------|--------------------------------------|
| 68 | Savini, Federico;<br>Boterman, Willem R.; van Gent, Wouter P. C.;<br>Majoer, Stan                                                                                                                                                                                                                           | 2016 | Amsterdam in the 21st century: Geography, housing, spatial development and politics                                       | Cities                               |
| 69 | Clausen, Helene<br>Balslev; Gyimothy, Szilvia                                                                                                                                                                                                                                                               | 2016 | Seizing community participation in sustainable development: pueblos Magicos of Mexico                                     | Journal of Cleaner Production        |
| 70 | Angrisano, Mariarosaria;<br>Biancamano, Paolo<br>Franco; Bosone, Martina; Carone, Paola; Daldanise, Gaia; De Rosa, Fortuna; Franciosa, Alfredo;<br>Gravagnuolo, Antonia; Iodice, Silvia; Nocca, Francesca; Onesti, Anna; Panaro, Simona; Ragozino, Stefania;<br>Sannicandro, Valentina; Girard, Luigi Fusco | 2016 | Towards operationalizing UNESCO Recommendations on Historic Urban Landscape: a position paper                             | Aestimum                             |
| 71 | Ilovan, Oana-Ramona; Jordan, Peter; Kinga-Xenia, Havadi-Nagy; Zametter, Thomas                                                                                                                                                                                                                              | 2016 | Identity Matters for Development: Austrian and Romanian Experiences                                                       | Transylvanian Review                 |
| 72 | Hooi, Ho Chea; Ahmad, Noor Hazlina; Amran, Azlan; Rahman, Syed Abidur                                                                                                                                                                                                                                       | 2016 | The functional role of entrepreneurial orientation and entrepreneurial bricolage in ensuring sustainable entrepreneurship | Management Research Review           |
| 73 | Lobo, Ivan D.; Velez, Maria; Puerto, Sergio                                                                                                                                                                                                                                                                 | 2016 | Leadership, entrepreneurship and collective action: a case study from the Colombian Pacific region                        | International Journal of the Commons |
| 74 | Figueira, Catarina; Caselli, Giorgio; Theodorakopoulos, Nicholas                                                                                                                                                                                                                                            | 2016 | Migrant entrepreneurs as cosmopolitan change agents A Bourdieuan perspective on capital accumulation                      | Society and Business Review          |
| 75 | Warnecke, Tonia; Houndonougbo, Ahiteme N.                                                                                                                                                                                                                                                                   | 2016 | Let There Be Light: Social Enterprise, Solar Power, and Sustainable Development                                           | Journal of Economic Issues           |

|    |                                                                                                                                               |      |                                                                                                                                                          |                                                                          |
|----|-----------------------------------------------------------------------------------------------------------------------------------------------|------|----------------------------------------------------------------------------------------------------------------------------------------------------------|--------------------------------------------------------------------------|
| 76 | Abou-Warda,<br>Sherein Hamed                                                                                                                  | 2016 | New educational services development Framework for technology entrepreneurship education at universities in Egypt                                        | International Journal of Educational Management                          |
| 77 | Satar, Mir Shahid;<br>John, Shibu                                                                                                             | 2016 | A conceptual model of critical success factors for Indian social enterprises                                                                             | World Journal of Entrepreneurship Management and Sustainable Development |
| 78 | Novelli, Marina;<br>Morgan, Nigel;<br>Mitchell, Geri;<br>Ivanov, Konstantin                                                                   | 2016 | Travel philanthropy and sustainable development: the case of the Plymouth-Banjul Challenge                                                               | Journal of Sustainable Tourism                                           |
| 79 | Khefacha, Islem;<br>Belkacem, Lotfi                                                                                                           | 2016 | Technology-based ventures and sustainable development: Cointegrating and causal relationships with a panel data approach                                 | Journal of International Trade & Economic Development                    |
| 80 | Mieszajkina, Elena                                                                                                                            | 2016 | Ecological Entrepreneurship and Sustainable Development                                                                                                  | Problemy Ekorozwoju                                                      |
| 81 | Andries, Petra;<br>Daou, Alain                                                                                                                | 2016 | Teaching Case: ViaVia Yogyakarta: Choosing the Right Strategy to Maximize Social Impact                                                                  | Sustainability                                                           |
| 82 | Erzurumlu, S.<br>Sinan; Erzurumlu,<br>Yaman O.                                                                                                | 2015 | Sustainable mining development with community using design thinking and multi-criteria decision analysis                                                 | Resources Policy                                                         |
| 83 | Raszkowski,<br>Andrzej                                                                                                                        | 2015 | Dzierzoniow Town in the eyes of its residents - a study report                                                                                           | Geoscape                                                                 |
| 84 | Case, Peter; Evans,<br>Louisa S.; Fabinyi,<br>Michael; Cohen,<br>Philippa J.; Hicks,<br>Christina C.;<br>Prideaux, Murray;<br>Mills, David J. | 2015 | Rethinking environmental leadership: The social construction of leaders and leadership in discourses of ecological crisis, development, and conservation | Leadership                                                               |
| 85 | Shah, Hina;<br>Saurabh, Punit                                                                                                                 | 2015 | Women Entrepreneurs in Developing Nations: Growth and Replication Strategies and Their Impact on Poverty Alleviation                                     | Technology Innovation Management Review                                  |
| 86 | Pirakatheeswari, P.                                                                                                                           | 2015 | Problems and Prospects of Women Entrepreneurs in India in the era of Globalization                                                                       | Pacific Business Review International                                    |
| 87 | Stal, Herman I.                                                                                                                               | 2015 | Inertia and change related to sustainability - An institutional approach                                                                                 | Journal of Cleaner Production                                            |
| 88 | Jose Sanzo-Perez,<br>Maria; Ignacio<br>Alvarez-Gonzalez,<br>Luis; Rey-Garcia,<br>Marta                                                        | 2015 | How to encourage social innovations: a resource-based approach                                                                                           | Service Industries Journal                                               |
| 89 | Warnecke, Tonia                                                                                                                               | 2015 | Greening Gender Equity: Microfinance and the Sustainable Development Agenda                                                                              | Journal of Economic Issues                                               |
| 90 | Vinokurova,<br>Natalia                                                                                                                        | 2015 | Sustainable Entrepreneurship and Women in Science and Education: Gender Equality, Gender Inequality                                                      | Entrepreneurship and Sustainability Issues                               |

|     |                                                                                                                          |      |                                                                                                                        |                                                                                                        |
|-----|--------------------------------------------------------------------------------------------------------------------------|------|------------------------------------------------------------------------------------------------------------------------|--------------------------------------------------------------------------------------------------------|
| 91  | Tu, Jui-Che;<br>Huang, Hsieh-Shan                                                                                        | 2015 | Analysis on the Relationship between Green Accounting and Green Design for Enterprises                                 | Sustainability                                                                                         |
| 92  | Rountree, Melissa<br>Markley; Koernig,<br>Stephen K.                                                                     | 2015 | Values-Based Education for Sustainability Marketers:<br>Two Approaches for Enhancing Student Social<br>Consciousness   | Journal of Marketing<br>Education                                                                      |
| 93  | Holt, Diane;<br>Littlewood, David                                                                                        | 2015 | Identifying, Mapping, and Monitoring the Impact of<br>Hybrid Firms                                                     | California Management<br>Review                                                                        |
| 94  | Hatak, Isabella;<br>Floh, Arne; Zauner,<br>Alexander                                                                     | 2015 | Working on a dream: sustainable organisational<br>change in SMEs using the example of the Austrian<br>wine industry    | Review of Managerial<br>Science                                                                        |
| 95  | Datta, Ayona                                                                                                             | 2015 | New urban utopias of postcolonial India:<br>'Entrepreneurial urbanization' in Dholera smart city,<br>Gujarat           | Dialogues in Human<br>Geography                                                                        |
| 96  | Popescu, Cristina<br>Raluca; Popescu,<br>Veronica Adriana;<br>Popescu, Gheorghe<br>N.                                    | 2015 | The Entrepreneur's role in the Performance Growth<br>of the Financial Audit Activity in Romania                        | Amfiteatru Economic                                                                                    |
| 97  | Wonglimpiyarat,<br>Jarunee                                                                                               | 2015 | Challenges of SMEs innovation and entrepreneurial<br>financing                                                         | World Journal of<br>Entrepreneurship<br>Management and<br>Sustainable Development                      |
| 98  | Khalid, Raja<br>Usman; Seuring,<br>Stefan; Beske,<br>Philip; Land, Anna;<br>Yawar, Sadaat Ali;<br>Wagner, Ralf           | 2015 | Putting sustainable supply chain management into<br>base of the pyramid research                                       | Supply Chain Management-<br>An International Journal                                                   |
| 99  | Zinenko, Anna;<br>Rosa Rovira, Maria;<br>Montiel, Ivan                                                                   | 2015 | The fit of the social responsibility standard ISO 26000<br>within other CSR instruments Redundant or<br>complementary? | Sustainability Accounting<br>Management and Policy<br>Journal                                          |
| 100 | Ingulfsvann, Are S.;<br>Jakobsen, Ove;<br>Nystad, Oystein                                                                | 2015 | Developing sustainable societies - a dialogical<br>network perspective                                                 | International Journal of<br>Social Economics                                                           |
| 101 | Evans, Louisa S.;<br>Hicks, Christina C.;<br>Cohen, Philippa J.;<br>Case, Peter;<br>Prideaux, Murray;<br>Mills, David J. | 2015 | Understanding leadership in the environmental<br>sciences                                                              | Ecology and Society                                                                                    |
| 102 | Sima, Elena                                                                                                              | 2015 | Efficiency of Resources Utilization in the Sustainable<br>Development of Rural Entrepreneurship                        | Scientific Papers-Series<br>Management Economic<br>Engineering in Agriculture<br>and Rural Development |

|     |                                                                                                                                                                  |      |                                                                                                                                                       |                                             |
|-----|------------------------------------------------------------------------------------------------------------------------------------------------------------------|------|-------------------------------------------------------------------------------------------------------------------------------------------------------|---------------------------------------------|
| 103 | Raimi, Lukman;<br>Akhuemonkhan,<br>Innocent;<br>Ogunjirin,<br>Olakunle Dare                                                                                      | 2015 | Corporate Social Responsibility and Entrepreneurship (CSRE): antidotes to poverty, insecurity and underdevelopment in Nigeria                         | Social Responsibility Journal               |
| 104 | Moskwa, Emily;<br>Higgins-Desbiolles,<br>Freya; Gifford,<br>Stuart                                                                                               | 2015 | Sustainability through food and conversation: the role of an entrepreneurial restaurateur in fostering engagement with sustainable development issues | Journal of Sustainable Tourism              |
| 105 | Hallak, Rob;<br>Assaker, Guy; Lee,<br>Craig                                                                                                                      | 2015 | Tourism Entrepreneurship Performance: The Effects of Place Identity, Self-Efficacy, and Gender                                                        | Journal of Travel Research                  |
| 106 | Halme, Minna;<br>Korpela, Maria                                                                                                                                  | 2014 | Responsible Innovation Toward Sustainable Development in Small and Medium-Sized Enterprises: a Resource Perspective                                   | Business Strategy and the Environment       |
| 107 | Badulescu, Alina;<br>Badulescu, Daniel;<br>Bac, Dorin; Sipos-<br>Gug, Sebastian                                                                                  | 2014 | Attitudes and Intentions of Business Master Students towards Sustainable Tourism and Entrepreneurship                                                 | Amfiteatru Economic                         |
| 108 | Morshed, Adnan                                                                                                                                                   | 2014 | Building Empowerment: Female Grameen Entrepreneurs in Rural Bangladesh                                                                                | South Asia-Journal of South Asian Studies   |
| 109 | Nicolopoulou,<br>Katerina                                                                                                                                        | 2014 | Social Entrepreneurship between Cross-Currents: Toward a Framework for Theoretical Restructuring of the Field                                         | Journal of Small Business Management        |
| 110 | Monteiro, Alcides<br>A.                                                                                                                                          | 2014 | The Active Role of Community-Based Organizations in the Local Redefinition of National Policies                                                       | Revista De Cercetare Si Interventie Sociala |
| 111 | Warnecke, Tonia                                                                                                                                                  | 2014 | The Individualist Entrepreneur vs. Socially Sustainable Development: Can Microfinance Build Community?                                                | Journal of Economic Issues                  |
| 112 | Vickers, Ian; Lyon,<br>Fergus                                                                                                                                    | 2014 | Beyond green niches? Growth strategies of environmentally-motivated social enterprises                                                                | International Small Business Journal        |
| 113 | Colvin, John;<br>Blackmore, Chris;<br>Chimbuya, Sam;<br>Collins, Kevin;<br>Dent, Mark; Goss,<br>John; Ison, Ray;<br>Roggero, Pier<br>Paolo; Seddaiu,<br>Giovanna | 2014 | In search of systemic innovation for sustainable development: A design praxis emerging from a decade of social learning inquiry                       | Research Policy                             |
| 114 | Doukas, Haris;<br>Tsiouisi, Anastasia;<br>Marinakis,<br>Vangelis; Psarras,<br>John                                                                               | 2014 | Linguistic multi-criteria decision making for energy and environmental corporate policy                                                               | Information Sciences                        |
| 115 | Ziegler, Rafael;<br>Schulz, Sabrina;<br>Richter, Lukas;<br>Schreck, Martin                                                                                       | 2014 | Following Gandhi: Social Entrepreneurship as A Non-Violent Way of Communicating Sustainability Challenges                                             | Sustainability                              |

|     |                                                                                                                             |      |                                                                                                                                                                                  |                                                                    |
|-----|-----------------------------------------------------------------------------------------------------------------------------|------|----------------------------------------------------------------------------------------------------------------------------------------------------------------------------------|--------------------------------------------------------------------|
| 116 | Barber, Nelson A.;<br>Wilson, Fiona;<br>Venkatachalam,<br>Venky; Cleaves,<br>Sara M.; Garnham,<br>Josina                    | 2014 | Integrating sustainability into business curricula:<br>University of New Hampshire case study                                                                                    | International Journal of<br>Sustainability in Higher<br>Education  |
| 117 | Wiltshier, Peter;<br>Edwards, Michael                                                                                       | 2014 | Managing knowledge transfer partnership for a rural<br>community The outcomes at Wirksworth, UK                                                                                  | Kybernetes                                                         |
| 118 | O'Rafferty, Simon;<br>Curtis, Hannah;<br>O'Connor, Frank                                                                    | 2014 | Mainstreaming sustainability in design education - a<br>capacity building framework                                                                                              | International Journal of<br>Sustainability in Higher<br>Education  |
| 119 | Garcia-Rodriguez,<br>Francisco J.; Leon<br>Garcia-Rodriguez,<br>Jose; Castilla-<br>Gutierrez, Carlos;<br>Major, Silverio A. | 2013 | Corporate Social Responsibility of Oil Companies in<br>Developing Countries: From Altruism to Business<br>Strategy                                                               | Corporate Social<br>Responsibility and<br>Environmental Management |
| 120 | Gilberthorpe,<br>Emma                                                                                                       | 2013 | Community development in Ok Tedi, Papua New<br>Guinea: the role of anthropology in the extractive<br>industries                                                                  | Community Development<br>Journal                                   |
| 121 | Lourenco,<br>Fernando                                                                                                       | 2013 | To challenge the world view or to flow with it?<br>Teaching sustainable development in business<br>schools                                                                       | Business Ethics-A European<br>Review                               |
| 122 | Shiuh-Shen, Chien                                                                                                           | 2013 | Chinese eco-cities: A perspective of landspeculation-<br>oriented local entrepreneurialism                                                                                       | China Information                                                  |
| 123 | Boons, Frank;<br>Montalvo, Carlos;<br>Quist, Jaco;<br>Wagner, Marcus                                                        | 2013 | Sustainable innovation, business models and<br>economic performance: an overview                                                                                                 | Journal of Cleaner<br>Production                                   |
| 124 | Hermans, Frans;<br>Stuiver, Marian;<br>Beers, P. J.; Kok,<br>Kasper                                                         | 2013 | The distribution of roles and functions for upscaling<br>and outscaling innovations in agricultural innovation<br>systems                                                        | Agricultural Systems                                               |
| 125 | Fink, Matthias;<br>Lang, Richard;<br>Harms, Rainer                                                                          | 2013 | Local responses to global technological change -<br>Contrasting restructuring practices in two rural<br>communities in Austria                                                   | Technological Forecasting<br>and Social Change                     |
| 126 | Szabo, Zsuzsanna<br>K.; Soltes, Michal;<br>Herman, Emilia                                                                   | 2013 | Innovative Capacity & Performance of Transition<br>Economies: Comparative Study at the Level of<br>Enterprises                                                                   | E & M Ekonomie A<br>Management                                     |
| 127 | Dorado, Silvia;<br>Ventresca, Marc J.                                                                                       | 2013 | Crescive entrepreneurship in complex social<br>problems: Institutional conditions for entrepreneurial<br>engagement                                                              | Journal of Business<br>Venturing                                   |
| 128 | Pless, Nicola M.;<br>Maak, Thomas;<br>Stahl, Guenter K.                                                                     | 2012 | Promoting Corporate Social Responsibility and<br>Sustainable Development through Management<br>Development: What can be learned from<br>International Service Learning Programs? | Human Resource<br>Management                                       |

|     |                                                                 |      |                                                                                                                                               |                                                                    |
|-----|-----------------------------------------------------------------|------|-----------------------------------------------------------------------------------------------------------------------------------------------|--------------------------------------------------------------------|
| 129 | Yildirim, Mucahit;<br>Turan, Gizem                              | 2012 | Sustainable development in historic areas: Adaptive re-use challenges in traditional houses in Sanliurfa, Turkey                              | Habitat International                                              |
| 130 | Sigalla, Rachel<br>Jactan; Carney,<br>Stephen                   | 2012 | Poverty reduction through entrepreneurship: Microcredit, learning and ambivalence amongst women in urban Tanzania                             | International Journal of Educational Development                   |
| 131 | Seales, Lisa; Stein,<br>Taylor                                  | 2012 | Linking commercial success of tour operators and agencies to conservation and community benefits in Costa Rica                                | Environmental Conservation                                         |
| 132 | Barrutia, Jose M.;<br>Echebarria,<br>Carmen                     | 2012 | Greening regions: the effect of social entrepreneurship, co-decision and co-creation on the embrace of good sustainable development practices | Journal of Environmental Planning and Management                   |
| 133 | Botha, Marietjie J.;<br>Albertyn, Ruth M.                       | 2012 | Siyazama Entrepreneurial Development Project: Challenges of a Community-University Partnership within a Faculty of Theology                   | Acta Theologica                                                    |
| 134 | Larsson, Markus                                                 | 2012 | Environmental Entrepreneurship in Organic Agriculture in Jarna, Sweden                                                                        | Journal of Sustainable Agriculture                                 |
| 135 | Kimmel, Courtney<br>E.; Hull, R. Bruce                          | 2012 | Ecological Entrepreneurship Support Networks: Roles and functions for conservation organizations                                              | Geoforum                                                           |
| 136 | Hahn, Tobias;<br>Figge, Frank                                   | 2011 | Beyond the Bounded Instrumentality in Current Corporate Sustainability Research: Toward an Inclusive Notion of Profitability                  | Journal of Business Ethics                                         |
| 137 | Burch, Sarah                                                    | 2011 | Sustainable Development Paths: Investigating the Roots of Local Policy Responses to Climate Change                                            | Sustainable Development                                            |
| 138 | Partzsch, Lena;<br>Ziegler, Rafael                              | 2011 | Social entrepreneurs as change agents: a case study on power and authority in the water sector                                                | International Environmental Agreements-Politics Law and Economics  |
| 139 | Nikolaou, E. I.;<br>Ierapetritis, D.;<br>Tsagarakisa, K. P.     | 2011 | An evaluation of the prospects of green entrepreneurship development using a SWOT analysis                                                    | International Journal of Sustainable Development and World Ecology |
| 140 | Li, Jingfeng; Wang,<br>Jiguang; Fan,<br>Wenbin                  | 2011 | Yin yang and company growth: a case study of a coal company of Shanxi in China                                                                | Chinese Management Studies                                         |
| 141 | Lundstrom,<br>Anders; Zhou,<br>Chunyan                          | 2011 | Promoting innovation based on social sciences and technologies: the prospect of a social innovation park                                      | Innovation-The European Journal of Social Science Research         |
| 142 | Tancau, Maria<br>Magdalena                                      | 2011 | Crafting wild nature in south-west Uganda: rich communities, happy tourists?                                                                  | Journal of Eastern African Studies                                 |
| 143 | Hall, Jeremy K.;<br>Daneke, Gregory<br>A.; Lenox, Michael<br>J. | 2010 | Sustainable development and entrepreneurship: Past contributions and future directions                                                        | Journal of Business Venturing                                      |
| 144 | Pacheco, Desiree F.;<br>Dean, Thomas J.;<br>Payne, David S.     | 2010 | Escaping the green prison: Entrepreneurship and the creation of opportunities for sustainable development                                     | Journal of Business Venturing                                      |
| 145 | Parrish, Bradley D.                                             | 2010 | Sustainability-driven entrepreneurship: Principles of organization design                                                                     | Journal of Business Venturing                                      |

|     |                                                                                                                                                    |      |                                                                                                                                                     |                                                                       |
|-----|----------------------------------------------------------------------------------------------------------------------------------------------------|------|-----------------------------------------------------------------------------------------------------------------------------------------------------|-----------------------------------------------------------------------|
| 146 | Kuckertz, Andreas;<br>Wagner, Marcus                                                                                                               | 2010 | The influence of sustainability orientation on entrepreneurial intentions - Investigating the role of business experience                           | Journal of Business Venturing                                         |
| 147 | Nga, Joyce Koe Hwee;<br>Shamuganathan, Gomathi                                                                                                     | 2010 | The Influence of Personality Traits and Demographic Factors on Social Entrepreneurship Start Up Intentions                                          | Journal of Business Ethics                                            |
| 148 | Bridgstock, Ruth;<br>Lettice, Fiona;<br>Oezbilgin, Mustafa F.; Tatli, Ahu                                                                          | 2010 | Diversity management for innovation in social enterprises in the UK                                                                                 | Entrepreneurship and Regional Development                             |
| 149 | Hall, Jeremy;<br>Matos, Stelvia                                                                                                                    | 2010 | Incorporating impoverished communities in sustainable supply chains                                                                                 | International Journal of Physical Distribution & Logistics Management |
| 150 | Lettice, Fiona;<br>Parekh, Menka                                                                                                                   | 2010 | The social innovation process: themes, challenges and implications for practice                                                                     | International Journal of Technology Management                        |
| 151 | Shaw, Alison;<br>Sheppard, Stephen;<br>Burch, Sarah;<br>Flanders, David;<br>Wiek, Arnim;<br>Carmichael, Jeff;<br>Robinson, John;<br>Cohen, Stewart | 2009 | Making local futures tangible-Synthesizing, downscaling, and visualizing climate change scenarios for participatory capacity building               | Global Environmental Change-Human and Policy Dimensions               |
| 152 | Ras, Peter J.;<br>Vermeulen, Walter J. V.                                                                                                          | 2009 | Sustainable Production and the Performance of South African Entrepreneurs in a Global Supply Chain. The Case of South African Table Grape Producers | Sustainable Development                                               |
| 153 | Lopez-i-Gelats, Feliu;<br>David Tabara, J.;<br>Bartolome, Jordi                                                                                    | 2009 | The rural in dispute: Discourses of rurality in the Pyrenees                                                                                        | Geoforum                                                              |
| 154 | Hrabankova, M.;<br>Bohackova, I.                                                                                                                   | 2009 | Conditions of sustainable development in the Czech Republic in compliance with the recommendation of the European Commission                        | Agricultural Economics-Zemedelska Ekonomika                           |
| 155 | Iliskog, Elisabeth                                                                                                                                 | 2008 | Indicators for assessment of rural electrification - An approach for the comparison of apples and pears                                             | Energy Policy                                                         |
| 156 | Buchta, S.;<br>Stulrajter, Z.                                                                                                                      | 2007 | Divergence of some socio-economic indicators between rural and urban areas in Slovakia                                                              | Agricultural Economics-Zemedelska Ekonomika                           |
| 157 | Hrabankova, M.;<br>Bohackova, I.                                                                                                                   | 2007 | Conditions of sustainable development in the Czech Republic in compliance with the recommendation of the European Commission                        | Agricultural Economics-Zemedelska Ekonomika                           |
| 158 | Krisciunas, Kestutis;<br>Greblikaite, Jolita                                                                                                       | 2007 | Entrepreneurship in Sustainable Development: SMEs Innovativeness in Lithuania                                                                       | Inzinerine Ekonomika-Engineering Economics                            |
| 159 | Dixon, Sarah E. A.;<br>Clifford, Anne                                                                                                              | 2007 | Ecopreneurship - a new approach to managing the triple bottom line                                                                                  | Journal of Organizational Change Management                           |

|     |                                                    |      |                                                                                                                                                             |                                                          |
|-----|----------------------------------------------------|------|-------------------------------------------------------------------------------------------------------------------------------------------------------------|----------------------------------------------------------|
| 160 | Elkington, John                                    | 2006 | Governance for sustainability                                                                                                                               | Corporate Governance-An International Review             |
| 161 | Marsden, T; Smith, E                               | 2005 | Ecological entrepreneurship: sustainable development in local communities through quality food production and local branding                                | Geoforum                                                 |
| 162 | Albrecht, J                                        | 2002 | Environmental issue entrepreneurship: a Schumpeterian perspective                                                                                           | Futures                                                  |
| 163 | Hart, SL; Milstein, MB                             | 1999 | Global sustainability and the creative destruction of industries                                                                                            | Sloan Management Review                                  |
| 164 | Pastakia, A                                        | 1998 | Grassroots ecopreneurs: change agents for a sustainable society                                                                                             | Journal of Organizational Change Management              |
| 165 | Aprilia, Lady; Wibowo, Sigit S.                    | 2017 | The Impact of Social Capital on Crowdfunding Performance                                                                                                    | South East Asian Journal of Management                   |
| 166 | Parhankangas, Annaleena; Renko, Maija              | 2017 | Linguistic style and crowdfunding success among social and commercial entrepreneurs                                                                         | Journal of Business Venturing                            |
| 167 | Brown, Terrence E.; Boon, Edward; Pitt, Leyland F. | 2017 | Seeking funding in order to sell: Crowdfunding as a marketing tool                                                                                          | Business Horizons                                        |
| 168 | Vealey, Kyle P.; Gerding, Jeffrey M.               | 2016 | Rhetorical Work in Crowd-Based Entrepreneurship: Lessons Learned From Teaching Crowdfunding as an Emerging Site of Professional and Technical Communication | Ieee Transactions on Professional Communication          |
| 169 | Bernardino, Susana; Santos, J. Freitas             | 2016 | Financing social ventures by crowdfunding: The influence of entrepreneurs' personality traits                                                               | International Journal of Entrepreneurship and Innovation |
| 170 | Calic, Goran; Mosakowski, Elaine                   | 2016 | Kicking Off Social Entrepreneurship: How A Sustainability Orientation Influences Crowdfunding Success                                                       | Journal of Management Studies                            |
| 171 | Meyskens, Moriah; Bird, Lacy                       | 2015 | Crowdfunding and Value Creation                                                                                                                             | Entrepreneurship Research Journal                        |
| 172 | Hurt, Christine                                    | 2015 | Pricing Disintermediation: Crowdfunding and Online Auction IPOs                                                                                             | University of Illinois Law Review                        |
| 173 | Lehner, Othmar M.                                  | 2014 | The formation and interplay of social capital in crowdfunded social ventures                                                                                | Entrepreneurship and Regional Development                |

## Appendix 2

Classification and coding of the analyzed studies.

| S. No. | Coverage | Geographical Coverage | Context | Methodology | Themes | Contribution |
|--------|----------|-----------------------|---------|-------------|--------|--------------|
| 1      | B        | D                     | A       | C           | H      | A            |
| 2      | B        | D                     | A       | B;C         | I      | B            |
| 3      | A        | A                     | B       | B;C         | F      | B            |
| 4      | A,B      | A;B                   | A       | C           | A      | B            |

|    |     |   |     |     |         |     |
|----|-----|---|-----|-----|---------|-----|
| 5  | A   | A | B   | C   | C;G     | B   |
| 6  | A   | A | B;C | B   | B;F     | B   |
| 7  | A   | A | B   | B   | D;E;G   | B   |
| 8  | A,B | A | D   | C   | E       | D   |
| 9  | B   | A | B   | A   | C;I     | B   |
| 10 | B   | C | C   | C   | B;F     | C   |
| 11 | C   | F | A   | B   | I       | B   |
| 12 | A   | A | B   | C   | H       | B   |
| 13 | A   | A | B   | B   | E;I     | D   |
| 14 | B   | C | A   | C   | B;I     | B   |
| 15 | C   | F | A   | A   | B       | B   |
| 16 | B   | A | B   | C   | I       | B   |
| 17 | A   | A | B   | C   | B       | D   |
| 18 | A   | A | A;B | C   | H       | B;D |
| 19 | A   | A | C   | B   | C       | B   |
| 20 | A   | B | B   | C   | E       | B   |
| 21 | C   | F | B   | A   | I       | B   |
| 22 | B   | C | B   | B   | B;E     | B   |
| 23 | C   | F | C   | C   | D       | B   |
| 24 | A   | A | A   | B;C | B;I     | B   |
| 25 | A   | A | B   | C   | D;E;H;I | B   |
| 26 | C   | F | A   | B;C | B       | B   |
| 27 | A   | A | D   | C   | C       | B   |
| 28 | A   | B | A;C | B;C | D;F     | B   |
| 29 | A   | E | A   | C   | E       | C   |
| 30 | A   | B | A;C | C   | D;E     | B   |
| 31 | B   | C | A   | C   | I       | B   |
| 32 | C   | F | A   | A   | G       | B   |
| 33 | A   | A | A   | B   | D;G     | B   |
| 34 | A   | E | B;C | B   | C;E     | B   |
| 35 | A   | A | D   | B   | E       | D   |
| 36 | C   | F | C   | B   | I       | B   |
| 37 | B   | C | C   | B   | E       | B   |
| 38 | A   | F | A;C | C   | B;C     | B   |
| 39 | A   | B | A;C | B   | I       | B   |
| 40 | C   | F | B   | A   | E       | B   |
| 41 | B   | A | A   | C   | C       | B   |
| 42 | A   | A | A   | B   | I       | B   |
| 43 | B   | D | B   | B   | C       | B   |
| 44 | A   | B | B   | B   | E       | B   |
| 45 | B   | E | A   | C   | H       | A   |
| 46 | A   | A | A   | B;C | A       | A   |
| 47 | A   | A | B   | B   | I       | B   |
| 48 | B   | C | B   | C   | E       | B   |
| 49 | C   | F | B   | A   | B       | B   |
| 50 | B   | E | A   | C   | D;E     | B   |
| 51 | B   | C | A   | B;C | E       | B   |
| 52 | A   | A | A   | B   | B       | B   |
| 53 | B   | F | A   | A   | B;I     | B   |

|     |     |     |     |     |       |   |
|-----|-----|-----|-----|-----|-------|---|
| 54  | C   | F   | B   | A   | A,I   | B |
| 55  | B   | C   | D   | C   | C     | B |
| 56  | A   | A   | A,B | C   | G     | B |
| 57  | A   | A   | A   | B   | D     | B |
| 58  | A   | A   | B   | B   | D     | B |
| 59  | C   | F   | A   | A   | C     | B |
| 60  | A   | A   | A   | A   | I     | B |
| 61  | B   | C   | C   | C   | I     | B |
| 62  | A   | A   | B,C | C   | B     | B |
| 63  | A   | A   | A   | A   | E     | B |
| 64  | B   | C   | C   | C   | I     | B |
| 65  | B   | C   | A   | C   | C     | B |
| 66  | B   | C   | A   | C   | B,E   | B |
| 67  | A   | A   | B   | B,C | I     | B |
| 68  | A   | A   | C   | C   | C     | B |
| 69  | B   | B   | B   | B,C | C     | B |
| 70  | A   | A   | A   | A   | C     | B |
| 71  | A,B | A   | C   | B,C | H,I   | B |
| 72  | B   | C   | A   | C   | I     | B |
| 73  | A   | B   | B   | B   | H     | B |
| 74  | A   | A   | A   | A   | H     | B |
| 75  | B   | F   | A   | B   | I     | C |
| 76  | B   | D   | A   | C   | B,F   | B |
| 77  | B   | C   | A   | A   | A     | B |
| 78  | A,B | A,E | B,C | C   | I     | B |
| 79  | C   | F   | A   | C   | B     | B |
| 80  | C   | F   | B   | A   | E     | B |
| 81  | B   | C   | B   | B   | C     | B |
| 82  | A   | E   | B   | B   | C     | B |
| 83  | A   | A   | D   | C   | C,D,E | B |
| 84  | C   | F   | A   | A   | E,H   | B |
| 85  | B   | C   | A   | A   | D,I   | B |
| 86  | B   | C   | A   | A   | I     | B |
| 87  | A   | A   | B   | B   | C,E   | B |
| 88  | A   | A   | A   | C   | B     | B |
| 89  | B   | F   | A   | A   | E,G,I | B |
| 90  | B   | C   | A   | C   | F,I   | B |
| 91  | C   | F   | B   | A   | E     | B |
| 92  | A   | B   | C   | B   | F     | B |
| 93  | B   | D   | A   | C   | I     | A |
| 94  | A   | A   | A   | C   | I     | A |
| 95  | B   | C   | D   | B   | C     | B |
| 96  | B   | A   | A   | C   | G     | B |
| 97  | B   | C   | A   | B,C | B,G   | B |
| 98  | C   | F   | A   | A   | I     | B |
| 99  | C   | F   | A   | A   | I     | B |
| 100 | A   | B   | A   | C   | H     | B |
| 101 | C   | F   | B   | A   | E,H   | B |

|     |     |     |       |     |         |     |
|-----|-----|-----|-------|-----|---------|-----|
| 102 | B   | A   | A;C   | A   | C       | B   |
| 103 | B   | D   | A     | C   | I       | B   |
| 104 | A   | E   | B;C   | B   | D       | A   |
| 105 | A   | E   | C     | C   | I       | B   |
| 106 | B   | A   | A     | B   | B       | B   |
| 107 | B   | A   | A     | C   | F;I     | B   |
| 108 | B   | C   | C     | B   | C;I     | B   |
| 109 | C   | F   | A     | A   | A       | B   |
| 110 | A   | A   | C     | C   | C;H     | B   |
| 111 | A   | B   | A     | A   | C;G     | B   |
| 112 | A   | A   | A     | B;C | E       | B   |
| 113 | A;B | A;D | A     | B   | B;F     | D   |
| 114 | A   | A   | D     | C   | E;I     | B   |
| 115 | A   | A   | B     | B   | A       | B   |
| 116 | A   | B   | B;C   | B   | F       | B   |
| 117 | A   | A   | D     | B   | C;F     | A   |
| 118 | A   | A   | B;C   | C   | F       | A   |
| 119 | B   | D   | A     | B   | I       | B   |
| 120 | B   | E   | D     | B   | C       | B   |
| 121 | C   | F   | A;C   | A   | F       | B   |
| 122 | B   | C   | C     | A   | E       | B   |
| 123 | C   | F   | B     | A   | B       | B   |
| 124 | A   | A   | C     | C   | B;C     | B   |
| 125 | A   | A   | A     | B   | B;C     | D   |
| 126 | A;B | A   | A     | A   | B       | D   |
| 127 | A;B | B;C | A     | B   | D       | B   |
| 128 | C   | F   | A     | C   | F;I     | B   |
| 129 | B   | C   | B;C   | B   | C       | B   |
| 130 | B   | D   | C     | C   | D;F;G;I | B   |
| 131 | B   | E   | C     | C   | C;I     | B   |
| 132 | A   | A   | B     | C   | E       | B   |
| 133 | B   | D   | D     | B   | C;F     | B   |
| 134 | A   | A   | C     | B;C | C;E     | B   |
| 135 | A   | B   | D     | C   | E       | B   |
| 136 | C   | F   | A;C   | A   | G       | A;B |
| 137 | C   | F   | B     | A   | E       | B   |
| 138 | B   | A   | A;B;C | B   | I       | B   |
| 139 | A   | A   | B     | C   | E       | C   |
| 140 | B   | C   | A     | B   | H       | B   |
| 141 | B   | C   | C     | A   | B       | D   |
| 142 | B   | D   | C     | B   | I       | B   |
| 143 | C   | F   | A     | A   | A       | B   |
| 144 | C   | F   | A     | A   | E       | B   |
| 145 | C   | F   | A     | B   | I       | B   |
| 146 | A   | A   | A     | C   | I       | B   |
| 147 | B   | C   | A;C   | C   | H       | B   |
| 148 | A   | A   | A     | C   | B       | B   |
| 149 | B   | F   | A     | B   | C       | B   |
| 150 | A   | A   | A     | C   | B       | B   |

|     |   |   |     |     |     |     |
|-----|---|---|-----|-----|-----|-----|
| 151 | C | F | B   | C   | E   | B   |
| 152 | B | D | B   | C   | I   | A   |
| 153 | B | A | D   | C   | C   | B   |
| 154 | A | A | A;C | A   | C   | B   |
| 155 | C | F | A;B | C   | C;I | A   |
| 156 | B | A | A;C | C   | C;D | D   |
| 157 | A | A | A   | A   | C   | B   |
| 158 | A | A | A   | A   | B   | B;D |
| 159 | A | A | A   | B;C | D;E | A   |
| 160 | C | F | A   | A   | H   | B   |
| 161 | A | A | D   | B   | C;E | A   |
| 162 | C | F | A   | A   | E   | B   |
| 163 | C | F | A   | A   | B   | A   |
| 164 | B | C | A   | B;C | E   | D   |
| 165 | B | C | A   | B   | G   | A   |
| 166 | C | F | A   | C   | G   | D   |
| 167 | C | F | A   | C   | G   | B   |
| 168 | A | B | A   | B   | F;G | B   |
| 169 | A | A | A   | C   | G;H | B   |
| 170 | C | F | A   | C   | G   | A   |
| 171 | C | F | A   | A   | G   | B   |
| 172 | A | B | A   | A   | G   | B   |
| 173 | C | F | A   | B;C | G   | B   |
